# Supplementary material for: Confirmation of a metastasis-specific microRNA signature in primary colon cancer
Source: PubMed Central journal article supplement (PMC5869672; doi:10.1038/s41598-018-22532-1), 2018-03-27
Supplement: 41598_2018_22532_MOESM1_ESM.pdf [file 41598_2018_22532_MOESM1_ESM.pdf]

**Supplementary information to:**

**Confirmation of a metastasis-specific microRNA signature in primary colon cancer**

Robert R.J. Coebergh van den Braak<sup>a\*</sup>, Anieta M. Sieuwerts<sup>b,c</sup>, Zarina S. Lalmahomed<sup>a</sup>, Marcel Smid<sup>b</sup>, Saskia M. Wilting<sup>b</sup>, Sandra I. Bril<sup>a,b</sup>, Shanshan Xiang<sup>a,b</sup>, Michelle Daane – van der Vlugt<sup>b</sup>, Vanja de Weerd<sup>b</sup>, Anne van Galen<sup>b</sup>, Katharina Biermann<sup>d</sup>, J Han JM van Krieken<sup>e</sup>, Wigard P. Kloosterman<sup>f</sup>, John A. Foekens<sup>b</sup>, MATCH study group, John W.M. Martens<sup>b,c</sup>, Jan N.M. IJzermans<sup>a</sup>.

<sup>a</sup> Department of Surgery, Erasmus MC Medical Center, 's Gravendijkwal 230, 3015 CE Rotterdam, the Netherlands, <sup>b</sup> Department of Medical Oncology, Erasmus MC Cancer Institute, Erasmus University Medical Center, Rotterdam, the Netherlands, <sup>c</sup> Cancer Genomics Center Netherlands, Amsterdam, The Netherlands, <sup>d</sup> Department of Pathology, Erasmus MC Medical Center, Rotterdam, the Netherlands, <sup>e</sup> Department of Pathology, Radboud UMC, Geert Grooteplein Zuid 10, 6525 GA Nijmegen, the Netherlands, <sup>f</sup> Department of Genetics, Center for Molecular Medicine, University Medical Center Utrecht, Heidelberglaan 100, 3584 CX Utrecht, The Netherlands

**Supplementary Table S1a. Clinical and histopathological characteristics of the total group**

|                               |              | n   | %      | miR-320               |         | miR-221               |         | miR-30b               |         | miR-10b               |         | miR-885-5p               |         | let-7i                |         |
|-------------------------------|--------------|-----|--------|-----------------------|---------|-----------------------|---------|-----------------------|---------|-----------------------|---------|--------------------------|---------|-----------------------|---------|
|                               |              |     |        | median (IQR)          | P value | median (IQR)          | P value | median (IQR)          | P value | median (IQR)          | P value | median (IQR)             | P value | median (IQR)          | P value |
| <b>Gender</b>                 | Female       | 104 | 44.8%  | -4.52 (-5.07 • -4.10) | 0.82    | -1.84 (-2.49 • -1.05) | 0.64    | -1.67 (-2.12 • -1.19) | 0.008   | -2.49 (-3.07 • -1.90) | 0.26    | -11.10 (-13.00 • -10.16) | 0.30    | -2.88 (-3.44 • -2.37) | 0.14    |
|                               | Male         | 128 | 55.2%  | -4.56 (-4.94 • -4.03) |         | -1.77 (-2.35 • -1.08) |         | -1.47 (-1.92 • -1.03) |         | -2.64 (-3.15 • -2.03) |         | -10.93 (-12.29 • -10.20) |         | -3.10 (-3.71 • -2.50) |         |
| <b>Age</b>                    |              | 232 | 100.0% | -0.04                 | 0.52    | -0.09                 | 0.20    | -0.07                 | 0.26    | .01                   | 0.94    | -0.03                    | 0.70    | 0.03                  | 0.61    |
| <b>Tumor stage</b>            | Stage I      | 57  | 24.6%  | -4.61 (-5.01 • -4.03) | 0.62    | -1.78 (-2.45 • -0.88) | 0.92    | -1.55 (-1.97 • -1.07) | 0.002   | -2.62 (-3.29 • -1.90) | 0.27    | -11.21 (-12.88 • -10.09) | 0.041   | -2.59 (-3.55 • -2.09) | 0.47    |
|                               | Stage II     | 98  | 42.2%  | -4.49 (-4.99 • -4.08) |         | -1.77 (-2.51 • -1.16) |         | -1.75 (-2.17 • -1.35) |         | -2.66 (-3.13 • -2.02) |         | -11.39 (-13.00 • -10.52) |         | -3.15 (-3.61 • -2.66) |         |
|                               | Stage III    | 77  | 33.2%  | -4.61 (-5.08 • -4.11) |         | -1.82 (-2.33 • -1.01) |         | -1.33 (-1.62 • -1.01) |         | -2.45 (-2.97 • -1.98) |         | -10.52 (-11.46 • -9.86)  |         |                       |         |
| <b>T status</b>               | T2           | 68  | 29.3%  | -4.58 (-4.93 • -4.03) | 0.61    | -1.78 (-2.39 • -0.99) | 0.52    | -1.48 (-1.92 • -0.99) | 0.33    | -2.58 (-3.17 • -1.89) | 0.93    | -10.79 (-12.58 • -9.99)  | 0.20    | -2.65 (-3.54 • -2.12) | 0.054   |
|                               | T3           | 164 | 70.7%  | -4.51 (-5.05 • -4.10) |         | -1.80 (-2.37 • -1.13) |         | -1.59 (-1.97 • -1.14) |         | -2.59 (-3.08 • -2.01) |         | -11.11 (-13.00 • -10.26) |         | -3.09 (-3.56 • -2.62) |         |
| <b>Nodal status</b>           | N0           | 127 | 54.7%  | -4.47 (-4.95 • -4.01) | 0.38    | -1.77 (-2.51 • -1.13) | 0.48    | -1.75 (-2.13 • -1.32) | <0.001  | -2.61 (-3.11 • -1.91) | 0.54    | -11.34 (-13.00 • -10.48) | 0.002   | -3.05 (-3.54 • -2.38) | 0.87    |
|                               | N0 <10 nodes | 28  | 12.1%  | -4.72 (-5.14 • -4.13) |         | -1.71 (-2.46 • -0.67) |         | -1.40 (-1.99 • -0.91) |         | -2.73 (-3.37 • -2.06) |         | -11.28 (-12.94 • -9.50)  |         | -3.12 (-3.96 • -2.36) |         |
|                               | N1           | 52  | 22.4%  | -4.69 (-5.06 • -4.16) |         | -1.89 (-2.32 • -1.15) |         | -1.32 (-1.64 • -0.92) |         | -2.46 (-3.13 • -2.03) |         | -10.62 (-11.49 • -9.89)  |         | -2.86 (-3.39 • -2.46) |         |
|                               | N2           | 25  | 10.8%  | -4.41 (-5.19 • -3.83) |         | -1.42 (-2.35 • -0.52) |         | -1.38 (1.53 • -1.01)  |         | -2.36 (-2.84 • -1.95) |         | -10.41 (-12.12 • -9.66)  |         | -3.08 (-3.73 • -2.65) |         |
| <b>Tumor grade</b>            | Good         | 20  | 8.6%   | -4.61 (-5.12 • -4.11) | 0.41    | -1.61 (-2.24 • -1.12) | 0.72    | -1.58 (-1.98 • -1.22) | 0.056   | -2.73 (-3.13 • -2.31) | 0.56    | -11.36 (-11.85 • -10.26) | 0.14    | -3.08 (-3.72 • -2.68) | 0.34    |
|                               | Moderate     | 184 | 79.3%  | -4.55 (-5.05 • -4.04) |         | -1.81 (-2.40 • -1.06) |         | -1.58 (-1.99 • -1.16) |         | -2.58 (-3.11 • -1.95) |         | -11.11 (-13.00 • -10.24) |         | -3.06 (-3.56 • -2.44) |         |
|                               | Poor         | 20  | 8.6%   | -4.38 (-4.84 • -4.14) |         | -1.58 (-2.50 • -0.83) |         | -1.24 (-1.71 • -0.92) |         | -2.84 (-3.28 • -2.28) |         | -10.51 (-12.52 • -9.94)  |         | -2.95 (-3.72 • -2.44) |         |
|                               | Other        | 8   | 3.4%   | -4.36 (-5.14 • -3.68) |         | -2.21 (-2.35 • -1.85) |         | -1.49 (-1.61 • -0.80) |         | -1.79 (-2.55 • -1.17) |         | -9.98 (-10.94 • -9.19)   |         | -2.86 (-3.04 • -2.24) |         |
| <b>Location</b>               | Right        | 115 | 49.6%  | -4.41 (-4.84 • -4.03) | 0.036   | -2.11 (-2.56 • -1.17) | 0.006   | -1.62 (-2.01 • -1.23) | 0.016   | -2.25 (-2.72 • -1.71) | <0.001  | -11.10 (-13.00 • -10.10) | 0.98    | -2.99 (-3.55 • -2.38) | 0.48    |
|                               | Left         | 117 | 50.4%  | -4.67 (-5.15 • -4.11) |         | -1.60 (-2.23 • -0.97) |         | -1.41 (-1.91 • -1.04) |         | -2.88 (-3.39 • -2.34) |         | -11.01 (-12.62 • -10.21) |         | -3.09 (-3.59 • -2.50) |         |
| <b>MSI-status<sup>a</sup></b> | MSI          | 46  | 19.8%  | -4.38 (-4.86 • -3.90) | 0.18    | -2.45 (-3.05 • -2.10) | <0.001  | -1.88 (-2.14 • -1.52) | <0.001  | -2.12 (-2.59 • -1.64) | <0.001  | -11.65 (-13.00 • -10.53) | 0.001   | -2.79 (-3.26 • -2.38) | 0.09    |
|                               | MSS          | 185 | 79.7%  | -4.55 (-5.08 • -4.09) |         | -1.65 (-2.24 • -0.96) |         | -1.48 (-1.91 • -1.06) |         | -2.65 (-3.19 • -2.13) |         | -10.92 (-12.15 • -10.10) |         | -3.08 (-3.65 • -2.46) |         |

<sup>a</sup> n=1 missing

**Supplementary Table S1b. Clinical and histopathological characteristics of the lymph node positive group**

|                     |              | n  | %     | miR-320               |         | miR-221               |         | miR-30b               |         | miR-10b               |         | miR-885-5p               |         | let-7i                |         |
|---------------------|--------------|----|-------|-----------------------|---------|-----------------------|---------|-----------------------|---------|-----------------------|---------|--------------------------|---------|-----------------------|---------|
|                     |              |    |       | median (IQR)          | P value | median (IQR)          | P value | median (IQR)          | P value | median (IQR)          | P value | median (IQR)             | P value | median (IQR)          | P value |
| <b>Gender</b>       | Female       | 31 | 40.3% | -4.73 (-5.18 • -4.11) | 0.61    | -2.10 (-2.37 • -0.79) | 0.84    | -1.47 (-1.77 • -1.06) | 0.22    | -2.46 (-2.97 • -2.13) | 0.57    | -11.03 (-13.00 • -10.06) | 0.09    | -2.80 (-3.39 • -2.56) | 0.57    |
|                     | Male         | 46 | 59.7% | -4.59 (-4.93 • -4.11) |         | -1.81 (-2.25 • -1.19) |         | -1.32 (-1.57 • -0.94) |         | -2.39 (-2.98 • -1.92) |         | -10.47 (-11.13 • -9.62)  |         | -3.06 (-3.57 • -2.51) |         |
| <b>Age</b>          |              | 77 | 100%  | -0.06                 | 0.60    | 0.01                  | 0.91    | -0.09                 | 0.43    | -0.15                 | 0.19    | -0.02                    | 0.87    | -0.05                 | 0.70    |
| <b>Tumor stage</b>  | Stage I      | 0  | 0.0%  | -                     | -       | -                     |         | -                     |         | -                     |         | -                        |         | -                     |         |
|                     | Stage II     | 0  | 0.0%  | -                     | -       | -                     |         | -                     |         | -                     |         | -                        |         | -                     |         |
|                     | Stage III    | 77 | 100%  | -4.61 (-5.08 • -4.11) |         | -1.82 (-2.33 • -1.01) |         | -1.33 (-1.62 • -1.01) |         | -2.45 (-2.97 • -1.98) |         | -10.52 (-11.46 • -9.86)  |         | -2.99 (-3.52 • -2.52) |         |
| <b>T status</b>     | T2           | 11 | 14.3% | -4.52 (-4.83 • -3.90) | 0.38    | -1.71 (-2.20 • -1.02) | 0.44    | -1.20 (-1.37 • -0.74) | 0.128   | -2.41 (-2.97 • -1.66) | 0.71    | -10.23 (-10.52 • -9.47)  | 0.10    | -3.04 (-3.20 • -2.45) | 0.81    |
|                     | T3           | 66 | 85.7% | -4.65 (-5.09 • -4.13) |         | -1.84 (-2.36 • -0.99) |         | -1.38 (-1.66 • -1.02) |         | -2.46 (-2.98 • -1.98) |         | -10.65 (-11.64 • -9.90)  |         | -2.97 (-3.53 • -2.53) |         |
| <b>Nodal status</b> | N0           | 0  | 0.0%  | -                     | -       | -                     |         | -                     |         | -                     |         | -                        |         | -                     |         |
|                     | N0 <10 nodes | 0  | 0.0%  | -                     | -       | -                     |         | -                     |         | -                     |         | -                        |         | -                     |         |
|                     | N1           | 52 | 67.5% | -4.69 (-5.06 • -4.16) | 0.38    | -1.89 (-2.32 • -1.15) | 0.44    | -1.32 (-1.64 • -0.92) | 0.13    | -2.46 (-3.13 • -2.03) | 0.71    | -10.62 (-11.49 • -9.89)  | 0.10    | -2.86 (-3.39 • -2.46) | 0.81    |
|                     | N2           | 25 | 32.5% | -4.41 (-5.19 • -3.83) |         | -1.42 (-2.35 • -0.52) |         | -1.38 (1.53 • -1.01)  |         | -2.36 (-2.84 • -1.95) |         | -10.41 (-12.12 • -9.66)  |         | -3.08 (-3.73 • -2.65) |         |
| <b>Tumor grade</b>  | Good         | 7  | 9.1%  | -4.88 (-5.44 • -4.25) | 0.11    | -2.20 (-2.34 • -1.36) | 0.57    | -1.79 (-2.09 • -1.17) | 0.11    | -2.72 (-2.96 • -2.47) | 0.52    | -10.26 (-11.52 • -9.82)  | 0.61    | -3.08 (-3.72 • -2.80) | 0.50    |
|                     | Moderate     | 54 | 70.1% | -4.69 (-5.07 • -4.09) |         | -1.80 (-2.36 • -0.99) |         | -1.32 (-1.60 • -0.99) |         | -2.35 (-2.94 • -1.89) |         | -10.74 (-11.79 • -10.01) |         | -2.92 (-3.53 • -2.49) |         |
|                     | Poor         | 11 | 14.3% | -4.28 (-4.61 • -4.11) |         | -1.11 (-1.82 • -0.78) |         | -1.09 (-1.38 • -0.78) |         | -2.78 (-3.29 • -2.17) |         | -10.30 (-10.52 • -9.73)  |         | -3.11 (-3.80 • -2.38) |         |
|                     | Other        | 5  | 6.5%  | -4.39 (-5.33 • -3.59) |         | -2.32 (-2.57 • -2.18) |         | -1.60 (-1.68 • -1.05) |         | -1.99 (-2.81 • -1.06) |         | -10.63 (-12.02 • -9.39)  |         | -2.93 (-3.22 • -2.47) |         |
| <b>Location</b>     | Right        | 36 | 46.8% | -4.31 (-4.80 • -3.80) | 0.00    | -1.94 (-2.36 • -0.90) | 0.96    | -1.47 (-1.65 • -1.03) | 0.36    | -2.06 (-2.53 • -1.57) | <0.001  | -10.54 (-11.39 • -9.62)  | 0.36    | -2.78 (-3.11 • -2.39) | 0.028   |
|                     | Left         | 41 | 53.2% | -4.82 (-5.24 • -4.45) |         | -1.80 (-2.27 • -1.27) |         | -1.27 (-1.61 • -0.91) |         | -2.74 (-3.31 • -2.34) |         | -10.52 (-11.67 • -10.11) |         | -3.12 (-3.68 • -2.68) |         |
| <b>MSI-status</b>   | MSI          | 12 | 15.6% | -4.31 (-5.23 • -3.55) | 0.33    | -2.37 (-2.86 • -1.68) | 0.015   | -1.58 (-1.89 • -1.47) | 0.009   | -2.06 (-2.52 • -1.82) | 0.049   | -11.45 (-13.00 • -9.79)  | 0.11    | -2.71 (-2.87 • -2.20) | 0.018   |
|                     | MSS          | 65 | 84.4% | -4.65 (-5.07 • -4.12) |         | -1.77 (-2.21 • -0.98) |         | -1.20 (-1.60 • -0.94) |         | -2.47 (-3.06 • -2.10) |         | -10.45 (-11.21 • -9.86)  |         | -3.08 (-3.62 • -2.55) |         |

## Supplementary Table S2. Univariate and multivariate Cox regression analysis for the total group

|                               |                    | n   | %     | Univariate           |         |                        |         |                     |         | Multivariate       |         |                     |         |                    |         |
|-------------------------------|--------------------|-----|-------|----------------------|---------|------------------------|---------|---------------------|---------|--------------------|---------|---------------------|---------|--------------------|---------|
|                               |                    |     |       | MFS (events=44)      |         | HFS (events=19)        |         | OS (events=41)      |         | MFS (events=44)    |         | HFS (events=19)     |         | OS (events=41)     |         |
|                               |                    |     |       | HR (95%CI)           | P value | HR (95%CI)             | P value | HR (95%CI)          | P value | HR (95%CI)         | P value | HR (95%CI)          | P value | HR (95%CI)         | P value |
| <b>mRNA expression</b>        | <i>MiR-320</i>     | 232 | 100%  | 0.88 (0.60 • 1.30)   | 0.53    | 0.95 (0.53 • 1.71)     | 0.87    | 0.96 (0.64 • 1.45)  | 0.86    |                    |         |                     |         |                    |         |
|                               | <i>MiR-221</i>     | 232 | 100%  | 1.36 (1.01 • 1.82)   | 0.041   | 1.24 (0.79 • 1.94)     | 0.35    | 1.02 (0.74 • 1.41)  | 0.89    |                    |         |                     |         |                    |         |
|                               | <i>MiR-30b</i>     | 232 | 100%  | 1.93 (1.24 • 3.01)   | 0.004   | 2.37 (1.20 • 4.66)     | 0.013   | 1.35 (0.84 • 2.17)  | 0.22    |                    |         |                     |         |                    |         |
|                               | <i>MiR-10b</i>     | 232 | 100%  | 1.03 (0.71 • 1.49)   | 0.87    | 0.65 (0.37 • 1.13)     | 0.13    | 1.02 (0.70 • 1.50)  | 0.92    |                    |         |                     |         |                    |         |
|                               | <i>MiR-885-5p</i>  | 232 | 100%  | 0.98 (0.80 • 1.20)   | 0.85    | 0.89 (0.64 • 1.22)     | 0.45    | 0.94 (0.76 • 1.16)  | 0.57    |                    |         |                     |         |                    |         |
|                               | <i>Let-7i</i>      | 232 | 100%  | 0.86 (0.62 • 1.19)   | 0.36    | 0.42 (0.27 • 0.64)     | <0.001  | 0.92 (0.66 • 1.27)  | 0.60    |                    |         |                     |         |                    |         |
| <b>Gender</b>                 | Female             | 104 | 44.8% | 1                    |         | 1                      |         | 1                   |         |                    |         |                     |         |                    |         |
|                               | Male               | 128 | 55.2% | 1.19 (0.65 • 2.18)   | 0.57    | 1.14 (0.46 • 2.82)     | 0.78    | 2.23 (1.15 • 4.59)  | 0.018   |                    |         |                     |         |                    |         |
| <b>Age</b>                    |                    | 232 | 100%  | 1.0002 (0.96 • 1.04) | 0.99    | 1.003 (0.95 • 1.06)    | 0.92    | 1.06 (1.02 • 1.11)  | 0.003   |                    |         |                     |         |                    |         |
| <b>Tumor stage</b>            | Stage I            | 57  | 24.6% | 1                    |         | 1                      |         | 1                   |         |                    |         |                     |         |                    |         |
|                               | Stage II           | 98  | 42.2% | 1.51 (.63 • 3.61)    | 0.36    | 1.17 (0.35 • 3.90)     | 0.79    | 1.08 (0.46 • 2.54)  | 0.87    |                    |         |                     |         |                    |         |
|                               | Stage III          |     |       | 2.18 (0.92 • 5.18)   | 0.08    | 1.40 (0.41 • 4.79)     | 0.59    | 1.80 (0.78 • 4.15)  | 0.17    |                    |         |                     |         |                    |         |
| <b>T status</b>               | T2                 | 68  | 29.3% | 1                    |         | 1                      |         | 1                   |         |                    |         |                     |         |                    |         |
|                               | T3                 | 164 | 70.7% | 1.97 (0.92 • 4.24)   | 0.08    | 1.22 (0.44 • 3.38)     | 0.71    | 1.87 (0.86 • 4.07)  | 0.11    |                    |         |                     |         |                    |         |
| <b>Nodal status</b>           | N0                 | 127 | 54.7% | 1                    |         | 1                      |         | 1                   |         | 1                  |         | 1                   |         |                    |         |
|                               | N0 <10 nodes       | 28  | 12.1% | 1.20 (0.45 • 3.20)   | 0.72    | 3.41 (1.08 • 10.75)    | 0.036   | 1.53 (0.6 • 3.88)   | 0.38    | 1.16 (0.43 • 3.08) | 0.77    | 3.18 (1.01 • 10.02) | 0.049   | 1.44 (0.56 • 3.68) | 0.45    |
|                               | N1                 | 52  | 22.4% | 0.99 (0.44 • 2.26)   | 0.99    | 1.79 (0.57 • 5.65)     | 0.32    | 1.01 (0.42 • 2.45)  | 0.98    | 0.90 (0.39 • 2.05) | 0.80    | 1.43 (0.45 • 4.54)  | 0.54    | 0.94 (0.39 • 2.29) | 0.89    |
|                               | N2                 | 25  | 10.8% | 3.57 (1.71 • 7.47)   | 0.001   | 1.78 (0.37 • 8.59)     | 0.47    | 4.20 (1.96 • 9.00)  | <0.001  | 2.93 (1.37 • 6.28) | 0.006   | 1.19 (0.24 • 5.78)  | 0.83    | 3.60 (1.62 • 8.00) | 0.002   |
| <b>Tumor grade</b>            | Good               | 20  | 8.6%  | 1                    |         | 1                      |         | 1                   |         |                    |         |                     |         |                    |         |
|                               | Moderate           | 184 | 79.3% | 0.85 (0.30 • 2.39)   | 0.85    | 0.74 (0.17 • 3.26)     | 0.69    | 1.68 (0.40 • 7.04)  | 0.48    |                    |         |                     |         |                    |         |
|                               | Poor               | 20  | 8.6%  | 1.70 (0.50 • 5.81)   | 0.40    | 1.50 (0.25 • 8.97)     | 0.66    | 4.17 (0.89 • 19.66) | 0.07    |                    |         |                     |         |                    |         |
|                               | Other <sup>a</sup> | 8   | 3.4%  | -                    |         | -                      |         | -                   |         |                    |         |                     |         |                    |         |
| <b>Location</b>               | Right              | 115 | 49.6% | 1                    |         | 1                      |         | 1                   |         |                    |         |                     |         |                    |         |
|                               | Left               | 117 | 50.4% | 1.17 (0.65 • 2.12)   | 0.60    | 0.88 (0.36 • 2.17)     | 0.78    | 0.58 (0.31 • 1.09)  | 0.09    |                    |         |                     |         |                    |         |
| <b>MSI-status<sup>b</sup></b> | MSI                | 46  | 19.8% | 1                    |         | 1                      |         | 1                   |         |                    |         |                     |         |                    |         |
|                               | MSS                | 185 | 79.7% | 2.00 (0.79 • 5.08)   | 0.14    | 28.64 (0.24 • 3466.30) | 0.17    | 0.64 (0.32 • 1.25)  | 0.19    |                    |         |                     |         |                    |         |
| <b>Modified signature</b>     | low risk           | 111 | 47.8% | 1                    |         | 1                      |         | 1                   |         | 1                  |         | 1                   |         |                    |         |
|                               | high risk          | 121 | 52.2% | 2.12 (1.12 • 4.00)   | 0.02    | 5.17 (1.51 • 17.76)    | 0.009   | 2.12 (1.12 • 4.00)  | 0.02    | 1.81 (0.94 • 3.50) | 0.08    | 5.07 (1.46 • 17.59) | 0.011   | 1.50 (0.76 • 2.96) | 0.24    |

<sup>a</sup> n=1 missing

<sup>^</sup> there were no events in this subgroup

### Supplementary Table S3. Pathway analysis results

|                                                            | <i>Let-7i</i>   |                      | <i>MiR-30b</i>  |                      |
|------------------------------------------------------------|-----------------|----------------------|-----------------|----------------------|
|                                                            | P value         | % of predicted genes | P value         | % of predicted genes |
| GLYCOSPHINGOLIPID_BIOSYNTHESIS_GANGLIO_SERIES              | 1.35E-11        | -                    |                 |                      |
| GLYCOSAMINOGLYCAN_BIOSYNTHESIS_CHONDROITIN_SULFATE         | 1.95E-10        | -                    |                 |                      |
| <b>AXON_GUIDANCE</b>                                       | <b>3.41E-10</b> | 3.9%                 | <b>3.59E-04</b> | 11.6%                |
| <b>FOCAL_ADHESION</b>                                      | <b>7.61E-10</b> | 3.6%                 |                 |                      |
| <b>ECM_RECEPTOR_INTERACTION</b>                            | <b>1.33E-09</b> | 7.0%                 |                 |                      |
| <b>REGULATION_OF_ACTIN_CYTOSKELETON</b>                    | <b>1.80E-09</b> | 2.0%                 |                 |                      |
| PATHWAYS_IN_CANCER                                         | 2.22E-09        | -                    |                 |                      |
| <b>HEDGEHOG_SIGNALING_PATHWAY</b>                          | <b>2.44E-09</b> | 0.0%                 |                 |                      |
| RENAL_CELL_CARCINOMA                                       | 2.72E-09        | -                    |                 |                      |
| DILATED_CARDIOMYOPATHY                                     | 4.69E-09        | -                    |                 |                      |
| HYPERTROPHIC_CARDIOMYOPATHY_HCM                            | 4.83E-09        | -                    |                 |                      |
| <b>WNT_SIGNALING_PATHWAY</b>                               | <b>9.16E-09</b> | 2.7%                 |                 |                      |
| ARRHYTHMOGENIC_RIGHT_VENTRICULAR_CARDIOMYOPATHY_ARVC       | 1.05E-07        | -                    |                 |                      |
| <b>TGF_BETA_SIGNALING_PATHWAY</b>                          | <b>2.73E-07</b> | 6.0%                 |                 |                      |
| MELANOMA                                                   | 4.10E-07        | -                    |                 |                      |
| GLYCOSPHINGOLIPID_BIOSYNTHESIS_GLOBO_SERIES                | 3.05E-06        | -                    |                 |                      |
| UBIQUITIN_MEDIATED_PROTEOLYSIS                             |                 |                      | 3.90E-04        | -                    |
| MELANOGENESIS                                              |                 |                      | 1.35E-03        | -                    |
| RNA_POLYMERASE                                             |                 |                      | 2.58E-03        | -                    |
| HOMOLOGOUS_RECOMBINATION                                   |                 |                      | 2.69E-03        | -                    |
| SNARE_INTERACTIONS_IN_VESICULAR_TRANSPORT                  |                 |                      | 2.95E-03        | -                    |
| PRION_DISEASES                                             |                 |                      | 4.39E-03        | -                    |
| EPITHELIAL_CELL_SIGNALING_IN_HELICOBACTER_PYLORI_INFECTION |                 |                      | 8.69E-03        | -                    |
| TYROSINE_METABOLISM                                        |                 |                      | 1.09E-02        | -                    |
| FATTY_ACID_METABOLISM                                      |                 |                      | 2.08E-02        | -                    |

## Supplementary Table S4. Genes per pathway for which expression data was available

### GLYCOSPHINGOLIPID\_BIOSYNTHESIS\_GANGLIO\_SERIES

|          |      |      |         |         |            |            |         |
|----------|------|------|---------|---------|------------|------------|---------|
| B3GALT4  | GLB1 | HEXB | SLC33A1 | ST3GAL2 | ST6GALNAC3 | ST6GALNAC5 | ST8SIA1 |
| B4GALNT1 | HEXA | LCT  | ST3GAL1 | ST3GAL5 | ST6GALNAC4 | ST6GALNAC6 | ST8SIA5 |

### GLYCOSAMINOGLYCAN\_BIOSYNTHESIS\_CHONDROITIN\_SULFATE

|         |         |        |        |       |            |       |
|---------|---------|--------|--------|-------|------------|-------|
| B3GALT6 | B3GAT3  | CHPF2  | CHST13 | CHST3 | CHSY3      | UST   |
| B3GAT1  | B4GALT7 | CHST11 | CHST14 | CHST7 | CSGALNACT1 | XYLT1 |
| B3GAT2  | CHPF    | CHST12 | CHST15 | CHSY1 | CSGALNACT2 | XYLT2 |

### AXON\_GUIDANCE

|          |       |       |        |        |        |        |        |        |
|----------|-------|-------|--------|--------|--------|--------|--------|--------|
| ABL1     | EFNA1 | EPHB1 | LIMK1  | NRAS   | PLXNB2 | RHOD   | SEMA3G | SLIT2  |
| ABLIM1   | EFNA2 | EPHB2 | LIMK2  | NRP1   | PLXNB3 | RND1   | SEMA4A | SLIT3  |
| ABLIM2   | EFNA3 | EPHB3 | LRRC4C | NTN1   | PLXNC1 | ROBO1  | SEMA4B | SRGAP1 |
| ABLIM3   | EFNA4 | EPHB4 | MAPK1  | NTN3   | PPP3CA | ROBO2  | SEMA4C | SRGAP2 |
| ARHGEF12 | EFNA5 | EPHB6 | MAPK3  | NTN4   | PPP3CB | ROBO3  | SEMA4D | SRGAP3 |
| CDC42    | EFNB1 | FES   | MET    | NTNG1  | PPP3CC | ROCK1  | SEMA4F | UNC5A  |
| CDK5     | EFNB2 | FYN   | MRAS   | PAK1   | PPP3R1 | ROCK2  | SEMA4G | UNC5B  |
| CFL1     | EFNB3 | GNAI1 | NCK1   | PAK2   | PPP3R2 | RRAS   | SEMA5A | UNC5C  |
| CFL2     | EPHA1 | GNAI2 | NCK2   | PAK3   | PTK2   | RRAS2  | SEMA5B | UNC5D  |
| CHP1     | EPHA2 | GNAI3 | NFAT5  | PAK4   | RAC1   | SEMA3A | SEMA6A |        |
| CXCL12   | EPHA3 | GSK3B | NFATC1 | PAK7   | RAC2   | SEMA3B | SEMA6B |        |
| CXCR4    | EPHA4 | HRAS  | NFATC2 | PLXNA1 | RAC3   | SEMA3C | SEMA6C |        |
| DCC      | EPHA5 | ITGB1 | NFATC3 | PLXNA2 | RASA1  | SEMA3D | SEMA6D |        |
| DPYSL2   | EPHA7 | KRAS  | NFATC4 | PLXNA3 | RGSS3  | SEMA3E | SEMA7A |        |
| DPYSL5   | EPHA8 | L1CAM | NGEF   | PLXNB1 | RHOA   | SEMA3F | SLIT1  |        |

### FOCAL\_ADHESION

|          |         |        |        |        |        |          |         |       |
|----------|---------|--------|--------|--------|--------|----------|---------|-------|
| ACTB     | CCND1   | COMP   | IBSP   | ITGB8  | MYL6   | PIK3CD   | RAP1A   | TNN   |
| ACTC1    | CCND2   | CRK    | IGF1   | JUN    | MYLK   | PIK3CG   | RAP1B   | TNR   |
| ACTG1    | CCND3   | CRKL   | IGF1R  | KDR    | MYLK2  | PIK3R1   | RAPGEF1 | TNXB  |
| ACTN1    | CDC42   | CTNNB1 | ILK    | LAMA1  | MYLK3  | PIK3R2   | RELN    | TTN   |
| ACTN2    | CHAD    | DIAPH1 | ITGA10 | LAMA2  | MYLK4  | PIK3R3   | RHOA    | VASP  |
| ACTN3    | COL11A1 | DOCK1  | ITGA11 | LAMA3  | PAK1   | PIK3R5   | ROCK1   | VAV1  |
| ACTN4    | COL11A2 | EGF    | ITGA2  | LAMA4  | PAK2   | PIP5K1C  | ROCK2   | VAV2  |
| AKT1     | COL1A1  | EGFR   | ITGA2B | LAMA5  | PAK3   | POTEKP   | SHC1    | VAV3  |
| AKT2     | COL1A2  | ELK1   | ITGA3  | LAMB1  | PAK4   | PPP1CA   | SHC2    | VCL   |
| AKT3     | COL2A1  | ERBB2  | ITGA4  | LAMB2  | PAK7   | PPP1CB   | SHC3    | VEGFA |
| ARHGAP35 | COL3A1  | FARP2  | ITGA5  | LAMB3  | PARVA  | PPP1CC   | SHC4    | VEGFB |
| ARHGAP5  | COL4A1  | FIGF   | ITGA6  | LAMB4  | PARVB  | PPP1R12A | SOS1    | VEGFC |
| BAD      | COL4A2  | FLNA   | ITGA7  | LAMC1  | PARVG  | PRKCA    | SOS2    | VTN   |
| BCAR1    | COL4A4  | FLNB   | ITGA8  | LAMC2  | PDGFB  | PRKCB    | SPP1    | VWF   |
| BCL2     | COL4A6  | FLNC   | ITGA9  | LAMC3  | PDGFC  | PRKCG    | SRC     | XIAP  |
| BIRC2    | COL5A1  | FLT1   | ITGAV  | MAP2K1 | PDGFD  | PTEN     | THBS1   | ZYX   |
| BIRC3    | COL5A2  | FN1    | ITGB1  | MAPK1  | PDGFRA | PTK2     | THBS2   |       |
| BRAF     | COL5A3  | FYN    | ITGB3  | MAPK10 | PDGFRB | PXN      | THBS3   |       |
| CAPN2    | COL6A1  | GRB2   | ITGB4  | MAPK3  | PDPK1  | RAC1     | THBS4   |       |
| CAV1     | COL6A2  | GSK3B  | ITGB5  | MAPK8  | PGF    | RAC2     | TLN1    |       |
| CAV2     | COL6A3  | HGF    | ITGB6  | MAPK9  | PIK3CA | RAC3     | TLN2    |       |
| CAV3     | COL6A6  | HRAS   | ITGB7  | MET    | PIK3CB | RAF1     | TNC     |       |

## ECM\_RECEPTOR\_INTERACTION

|         |        |        |        |       |       |       |       |      |
|---------|--------|--------|--------|-------|-------|-------|-------|------|
| AGRN    | COL3A1 | COL6A3 | GP5    | ITGA3 | ITGB4 | LAMB1 | SDC3  | TNC  |
| CD36    | COL4A1 | COL6A6 | GP6    | ITGA4 | ITGB5 | LAMB2 | SDC4  | TNN  |
| CD44    | COL4A2 | DAG1   | GP9    | ITGA5 | ITGB6 | LAMB3 | SPP1  | TNR  |
| CD47    | COL4A4 | FN1    | HMMR   | ITGA6 | ITGB7 | LAMB4 | SV2A  | TNXB |
| CHAD    | COL4A6 | FNDC1  | HSPG2  | ITGA7 | ITGB8 | LAMC1 | SV2B  | VTN  |
| COL11A1 | COL5A1 | FNDC3A | IBSP   | ITGA8 | LAMA1 | LAMC2 | SV2C  | VWF  |
| COL11A2 | COL5A2 | FNDC4  | ITGA10 | ITGA9 | LAMA2 | LAMC3 | THBS1 |      |
| COL1A1  | COL5A3 | FNDC5  | ITGA11 | ITGAV | LAMA3 | RELN  | THBS2 |      |
| COL1A2  | COL6A1 | GP1BA  | ITGA2  | ITGB1 | LAMA4 | SDC1  | THBS3 |      |
| COL2A1  | COL6A2 | GP1BB  | ITGA2B | ITGB3 | LAMA5 | SDC2  | THBS4 |      |

## REGULATION\_OF\_ACTIN\_CYTOSKELETON

|          |        |       |        |        |         |         |          |          |
|----------|--------|-------|--------|--------|---------|---------|----------|----------|
| ABI2     | BAIAP2 | DOCK1 | FGF3   | ITGA2  | KRAS    | PAK1    | PIP4K2C  | SOS1     |
| ACTB     | BCAR1  | EGF   | FGF4   | ITGA2B | LIMK1   | PAK2    | PIP5K1A  | SOS2     |
| ACTC1    | BDKRB1 | EGFR  | FGF5   | ITGA3  | LIMK2   | PAK3    | PIP5K1B  | SSH1     |
| ACTG1    | BDKRB2 | EZR   | FGF6   | ITGA4  | MAP2K1  | PAK4    | PIP5K1C  | SSH2     |
| ACTN1    | BRAF   | F2    | FGF7   | ITGA5  | MAP2K2  | PAK7    | POTEKP   | SSH3     |
| ACTN2    | BRK1   | F2R   | FGF8   | ITGA6  | MAPK1   | PDGFB   | PPP1CA   | TIAM1    |
| ACTN3    | CD14   | FGD1  | FGF9   | ITGA7  | MAPK3   | PDGFRA  | PPP1CB   | TIAM2    |
| ACTN4    | CDC42  | FGD3  | FGFR1  | ITGA8  | MATK    | PDGFRB  | PPP1CC   | TMSB4X   |
| APC      | CFL1   | FGF1  | FGFR2  | ITGA9  | MOS     | PFN1    | PPP1R12A | TMSB4XP8 |
| APC2     | CFL2   | FGF10 | FGFR3  | ITGAD  | MRAS    | PFN2    | PPP1R12B | TMSB4Y   |
| ARHGAP35 | CHRM1  | FGF11 | FGFR4  | ITGAE  | MSN     | PFN3    | PTK2     | TTN      |
| ARHGEF1  | CHRM2  | FGF12 | FN1    | ITGAL  | MYH10   | PFN4    | PXN      | VAV1     |
| ARHGEF12 | CHRM3  | FGF13 | GIT1   | ITGAM  | MYH14   | PIK3CA  | RAC1     | VAV2     |
| ARHGEF4  | CHRM4  | FGF14 | GNA12  | ITGAV  | MYH9    | PIK3CB  | RAC2     | VAV3     |
| ARHGEF6  | CHRM5  | FGF16 | GNA13  | ITGAX  | MYL1    | PIK3CD  | RAC3     | VCL      |
| ARHGEF7  | CRK    | FGF17 | GNG12  | ITGB1  | MYL3    | PIK3CG  | RAF1     | WAS      |
| ARPC1A   | CRKL   | FGF18 | GSN    | ITGB2  | MYLK    | PIK3R1  | RDX      | WASF1    |
| ARPC1B   | CSK    | FGF19 | HRAS   | ITGB3  | MYLK2   | PIK3R2  | RHOA     | WASF2    |
| ARPC2    | CYFIP1 | FGF2  | IQGAP1 | ITGB4  | MYLK3   | PIK3R3  | ROCK1    | WASL     |
| ARPC3    | CYFIP2 | FGF20 | IQGAP2 | ITGB5  | MYLK4   | PIK3R5  | ROCK2    |          |
| ARPC4    | DIAPH1 | FGF21 | IQGAP3 | ITGB6  | NCKAP1  | PIKFYVE | RRAS     |          |
| ARPC5    | DIAPH2 | FGF22 | ITGA10 | ITGB7  | NCKAP1L | PIP4K2A | RRAS2    |          |
| ARPC5L   | DIAPH3 | FGF23 | ITGA11 | ITGB8  | NRAS    | PIP4K2B | SLC9A1   |          |

## HEDGEHOG\_SIGNALING\_PATHWAY

|       |          |         |        |       |        |       |       |      |
|-------|----------|---------|--------|-------|--------|-------|-------|------|
| BMP2  | BTRC     | CSNK1G3 | GSK3B  | PRKX  | STK36  | WNT2  | WNT6  | ZIC2 |
| BMP4  | CSNK1A1  | DHH     | HHIP   | PRKY  | SUFU   | WNT2B | WNT7A |      |
| BMP5  | CSNK1A1L | FBXW11  | IHH    | PTCH1 | WNT1   | WNT3  | WNT7B |      |
| BMP6  | CSNK1D   | GAS1    | LRP2   | PTCH2 | WNT10A | WNT3A | WNT8A |      |
| BMP7  | CSNK1E   | GLI1    | PRKACA | RAB23 | WNT10B | WNT4  | WNT8B |      |
| BMP8A | CSNK1G1  | GLI2    | PRKACB | SHH   | WNT11  | WNT5A | WNT9A |      |
| BMP8B | CSNK1G2  | GLI3    | PRKACG | SMO   | WNT16  | WNT5B | WNT9B |      |

## WNT\_SIGNALING\_PATHWAY

|         |          |        |        |         |          |        |         |       |
|---------|----------|--------|--------|---------|----------|--------|---------|-------|
| APC     | CSNK1A1L | DVL2   | GSK3B  | NKD2    | PPP3CC   | RBX1   | TBL1XR1 | WNT3A |
| APC2    | CSNK1E   | DVL3   | JUN    | NLK     | PPP3R1   | RHOA   | TBL1Y   | WNT4  |
| AXIN1   | CSNK2A1  | EP300  | LEF1   | PLCB1   | PPP3R2   | ROCK1  | TCF7    | WNT5A |
| AXIN2   | CSNK2A2  | FBXW11 | LRP5   | PLCB2   | PRICKLE1 | ROCK2  | TCF7L1  | WNT5B |
| BTRC    | CSNK2B   | FOSL1  | LRP6   | PLCB3   | PRICKLE2 | RUVBL1 | TCF7L2  | WNT6  |
| CACYBP  | CTBP1    | FRAT1  | MAP3K7 | PLCB4   | PRKACA   | SENP2  | TP53    | WNT7A |
| CAMK2A  | CTBP2    | FRAT2  | MAPK10 | PORCN   | PRKACB   | SFRP1  | VANGL1  | WNT7B |
| CAMK2B  | CTNNB1   | FZD1   | MAPK8  | PPARD   | PRKACG   | SFRP2  | VANGL2  | WNT8A |
| CAMK2D  | CTNNBIP1 | FZD10  | MAPK9  | PPP2CA  | PRKCA    | SFRP4  | WIF1    | WNT8B |
| CAMK2G  | CUL1     | FZD2   | MMP7   | PPP2CB  | PRKCB    | SFRP5  | WNT1    | WNT9A |
| CCND1   | CXCC4    | FZD3   | MYC    | PPP2R1A | PRKCG    | SIAH1  | WNT10A  | WNT9B |
| CCND2   | DAAM1    | FZD4   | NFAT5  | PPP2R1B | PRKX     | SKP1   | WNT10B  |       |
| CCND3   | DAAM2    | FZD5   | NFATC1 | PPP2R2A | PRKY     | SMAD2  | WNT11   |       |
| CER1    | DKK1     | FZD6   | NFATC2 | PPP2R2B | PSEN1    | SMAD3  | WNT16   |       |
| CHP1    | DKK2     | FZD7   | NFATC3 | PPP2R2C | RAC1     | SMAD4  | WNT2    |       |
| CREBBP  | DKK4     | FZD8   | NFATC4 | PPP3CA  | RAC2     | SOX17  | WNT2B   |       |
| CSNK1A1 | DVL1     | FZD9   | NKD1   | PPP3CB  | RAC3     | TBL1X  | WNT3    |       |

## TGF\_BETA\_SIGNALING\_PATHWAY

|        |        |        |       |        |         |        |        |         |
|--------|--------|--------|-------|--------|---------|--------|--------|---------|
| ACVR1  | BMP5   | COMP   | GDF7  | LEFTY1 | PPP2CB  | SMAD1  | SP1    | THBS4   |
| ACVR1B | BMP6   | CREBBP | ID1   | LEFTY2 | RBL1    | SMAD2  | TFDP1  | TNF     |
| ACVR1C | BMP7   | CUL1   | ID2   | LTBP1  | RBL2    | SMAD3  | TGFB1  | ZFYVE16 |
| ACVR2A | BMP8A  | DCN    | ID3   | MAPK1  | RBX1    | SMAD4  | TGFB2  | ZFYVE9  |
| ACVR2B | BMP8B  | E2F4   | ID4   | MAPK3  | RHOA    | SMAD5  | TGFB3  |         |
| ACVRL1 | BMPR1A | E2F5   | IFNG  | MYC    | ROCK1   | SMAD6  | TGFBR1 |         |
| AMH    | BMPR1B | EP300  | INHBA | NODAL  | ROCK2   | SMAD7  | TGFBR2 |         |
| AMHR2  | BMPR2  | FST    | INHBB | NOG    | RPS6KB1 | SMAD9  | THBS1  |         |
| BMP2   | CDKN2B | GDF5   | INHBC | PITX2  | RPS6KB2 | SMURF1 | THBS2  |         |
| BMP4   | CHRD   | GDF6   | INHBE | PPP2CA | SKP1    | SMURF2 | THBS3  |         |



**Supplementary Table S5. List of genes that were predicted as direct targets by the combined use of 3 independent target prediction algorithms.**

| miRNA          | Gene Symbol   | Gene Name                                          | Spearman's rho | P value |
|----------------|---------------|----------------------------------------------------|----------------|---------|
| <i>miR-30b</i> | <i>ABL1</i>   | ABL Proto-Oncogene 1, Non-Receptor Tyrosine Kinase | -0.032         | 0.63    |
|                | <i>CFL2</i>   | Cofilin 2                                          | 0.107          | 0.11    |
|                | <i>DPYSL2</i> | Dihydropyrimidinase Like 2                         | 0.072          | 0.28    |
|                | <i>EFNA3</i>  | Ephrin A3                                          | 0.121          | 0.07    |
|                | <i>GNAI2</i>  | G Protein Subunit Alpha I2                         | -0.030         | 0.65    |
|                | <i>NFAT5</i>  | Nuclear Factor Of Activated T-Cells 5              | -0.286         | <0.0001 |
|                | <i>NFATC2</i> | Nuclear Factor Of Activated T-Cells 2              | -0.009         | 0.90    |
|                | <i>NFATC3</i> | Nuclear Factor Of Activated T-Cells 3              | 0.067          | 0.32    |
|                | <i>PLXNA2</i> | Plexin A2                                          | -0.077         | 0.25    |
|                | <i>PLXNC1</i> | Plexin C1                                          | -0.007         | 0.92    |
|                | <i>PPP3R1</i> | Protein Phosphatase 3 Regulatory Subunit B, Alpha  | -0.331         | <0.001  |
|                | <i>RASA1</i>  | RAS P21 Protein Activator 1                        | -0.083         | 0.22    |
|                | <i>SEMA6B</i> | Semaphorin 6B                                      | -0.198         | 0.003   |
|                | <i>SEMA6D</i> | Semaphorin 6D                                      | 0.178          | 0.007   |
|                | <i>SRGAP3</i> | SLIT-ROBO Rho GTPase Activating Protein 3          | -0.018         | 0.79    |
|                | <i>UNC5C</i>  | Unc-5 Netrin Receptor C                            | 0.295          | <0.0001 |
| <i>Let-7i</i>  | <i>ACVR1C</i> | Activin A Receptor Type 1C                         | -0.113         | 0.09    |
|                | <i>CHRD</i>   | Chordin                                            | 0.422          | <0.0001 |
|                | <i>COL1A2</i> | Collagen Type I Alpha 2 Chain                      | 0.561          | <0.0001 |
|                | <i>COL3A1</i> | Collagen Type III Alpha 1 Chain                    | 0.576          | <0.0001 |
|                | <i>COL4A6</i> | Collagen Type IV Alpha 6 Chain                     | -0.258         | 0.0001  |
|                | <i>COL5A2</i> | Collagen Type V Alpha 2 Chain                      | 0.512          | <0.0001 |
|                | <i>E2F5</i>   | E2F Transcription Factor 5                         | 0.076          | 0.25    |
|                | <i>FNDC3A</i> | Fibronectin Type III Domain Containing 3A          | -0.295         | <0.0001 |
|                | <i>GDF6</i>   | Growth Differentiation Factor 6                    | 0.053          | 0.54    |
|                | <i>ITGB3</i>  | Integrin Subunit Beta 3                            | 0.196          | 0.0031  |
|                | <i>TGFBR1</i> | Transforming Growth Factor Beta Receptor 1         | 0.346          | <0.0001 |

**Supplementary Table S6. Gene assays used to measure mRNA expression of the six MiRNAs and 3 reference genes**

| INDEX         | Gene Symbol     | Gene Name                           | qPCR detection method  | Assay ID ThermoFisher Scientific |
|---------------|-----------------|-------------------------------------|------------------------|----------------------------------|
| Candidate miR | <b>MIR320</b>   | microRNA 320                        | TaqMan® MicroRNA Assay | 384                              |
| Candidate miR | <b>MIR221</b>   | microRNA 221                        | TaqMan® MicroRNA Assay | 2277                             |
| Candidate miR | <b>MIR30B</b>   | microRNA 30b                        | TaqMan® MicroRNA Assay | 2218                             |
| Candidate miR | <b>MIR10B</b>   | microRNA 10b                        | TaqMan® MicroRNA Assay | 524                              |
| Candidate miR | <b>MIR885</b>   | microRNA 885                        | TaqMan® MicroRNA Assay | 602                              |
| Candidate miR | <b>MIRLET7I</b> | microRNA let-7i                     | TaqMan® MicroRNA Assay | 2296                             |
| Reference miR | <b>MIR16-1</b>  | microRNA 16-1                       | TaqMan® MicroRNA Assay | 391                              |
| Reference miR | <b>RNU6B</b>    | RNA, U6 small nuclear 6, pseudogene | TaqMan® MicroRNA Assay | 1093                             |
| Reference miR | <b>SNORD44</b>  | small nucleolar RNA, C/D box 44     | TaqMan® MicroRNA Assay | 1094                             |
